# Supplementary material
Source: HighWire-hosted journal article supplement (https://bmjopen.bmj.com/content/10/8/e036753)
Supplement: inline-supplementary-material-2 [file inline-supplementary-material-2.pdf]

## Supplementary File 2: Study Eligibility Form

**Alcohol-related harm in rural and remote communities: a scoping review****Study Eligibility Form**February 12<sup>th</sup>, 2019

|                                                           |  |  |
|-----------------------------------------------------------|--|--|
| <b>Paper:</b> Any language or publication year acceptable |  |  |
|-----------------------------------------------------------|--|--|

  

|                                                         |            |           |
|---------------------------------------------------------|------------|-----------|
| <b>Population:</b>                                      |            |           |
| • Entire population defined as rural or remote OR       | <b>YES</b> | <b>NO</b> |
| • Portion of the population defined as rural or remote* |            |           |

  

|                                                                                                                 |            |           |
|-----------------------------------------------------------------------------------------------------------------|------------|-----------|
| <b>Predictor:</b>                                                                                               |            |           |
| • IF entire population defined as rural or remote: any predictor of harmful alcohol use or alcohol-related harm | <b>YES</b> | <b>NO</b> |
| • OTHERWISE: Rural or remote residence included as a predictor of harmful alcohol use or alcohol-related harm   |            |           |

  

|                                                               |  |  |
|---------------------------------------------------------------|--|--|
| <b>Analysis:</b> All forms of statistical analysis acceptable |  |  |
|---------------------------------------------------------------|--|--|

  

|                                        |            |           |
|----------------------------------------|------------|-----------|
| <b>Outcomes reported:</b>              |            |           |
| • Alcohol consumption OR               | <b>YES</b> | <b>NO</b> |
| • Alcohol-related harm (defined below) |            |           |

  

|                                                  |            |           |
|--------------------------------------------------|------------|-----------|
| <b>Type of article:</b>                          |            |           |
| • Cohort study (retrospective or prospective) OR | <b>YES</b> | <b>NO</b> |
| • Case-control OR                                |            |           |
| • Cross-sectional OR                             |            |           |
| • Meta-analysis OR                               |            |           |
| • Qualitative OR                                 |            |           |
| • Mixed methods                                  |            |           |

  

|                                                           |            |           |
|-----------------------------------------------------------|------------|-----------|
| <b>Duplicated population:</b>                             |            |           |
| • If duplicated, does this study provide new information? | <b>YES</b> | <b>NO</b> |
| • If duplicated, is study more recent?                    |            |           |

  

|                                                                    |                |  |
|--------------------------------------------------------------------|----------------|--|
| <b>Study inclusion:</b>                                            |                |  |
| • All the answers are YES                                          | <b>INCLUDE</b> |  |
| • Any answer is NO                                                 | <b>EXCLUDE</b> |  |
| • If you are unsure of the answer, include for full text screening | <b>INCLUDE</b> |  |

\* this can include a rural/remote to urban comparison within the study

## Supplementary File 2: Study Eligibility Form

**Outcome Definitions***Alcohol-Related Harm Includes:*

- Harmful alcohol-related behavior:
  - Alcohol-Related Violence
    - Interpersonal
    - Self-harm
  - Drunk Driving
- Hospitalizations entirely caused by alcohol (Canadian Institute of Health Information (CIHI) code descriptors)
  - Alcohol-induced pseudo-Cushing's syndrome
  - Mental and behavioural disorders due to use of alcohol
  - Degeneration of nervous system due to alcohol
  - Alcoholic polyneuropathy
  - Alcoholic myopathy
  - Alcoholic cardiomyopathy
  - Alcoholic gastritis
  - Alcoholic liver disease
  - Alcohol-induced acute pancreatitis
  - Alcohol-induced chronic pancreatitis
  - Maternal care for (suspected) damage to fetus from alcohol
  - Mental disorders and diseases of the nervous system complicating pregnancy, childbirth and the puerperium
  - Fetal alcohol syndrome (dysmorphic)
  - Finding of alcohol in blood
  - Toxic effects of alcohol
  - Accidental poisoning by and exposure to alcohol
  - Intentional self-poisoning by and exposure to alcohol
  - Poisoning by and exposure to alcohol, undetermined intent
  - Alcohol intoxication delirium or withdrawal delirium
  - Alcohol persisting amnesic disorder
  - Alcohol persisting dementia
  - Alcohol-induced psychotic disorder, with hallucinations
  - Alcohol-induced psychotic disorder, with delusions
  - Alcohol withdrawal
  - Alcohol-induced sleep disorder
  - Alcohol-induced anxiety disorder, mood disorder or sexual dysfunction
  - Alcohol-related disorder not otherwise specified
  - Alcohol intoxication
  - Alcohol dependence

## Supplementary File 2: Study Eligibility Form

- Alcohol abuse
- Alcohol intoxication delirium or withdrawal delirium
- Alcohol-induced major neurocognitive disorder, amnesic confabulatory type
- Alcohol-induced major neurocognitive disorder, nonamnesic confabulatory type
- Alcohol-induced anxiety disorder, bipolar and related disorder, depressive disorder, mild neurocognitive disorder or sexual dysfunction
- Alcohol-induced psychotic disorder or unspecified alcohol-related disorder
- Alcohol use disorder, moderate/severe
- Alcohol use disorder, mild
- Emergency department visits entirely caused by alcohol
  - Same definitions as hospitalizations
- Alcohol-attributable mortality
